# Supplementary material
Source: publisher figshare collection journal article supplement (https://acs.figshare.com/ndownloader/files/3619572)
Supplement: Supplementary file 1 [file 3619572]

# **Title: Direct Coherent Raman Temperature Imaging and Wideband Chemical Detection in a Hydrocarbon Flat Flame**

**Authors:** A. Bohlin and C. J. Kliwer\*

## **Affiliation:**

Sandia National Laboratories, Livermore, CA 94551

\*Correspondence to: cjkliwer@sandia.gov

## **Supporting Information:**

### ***Synthetic temperature profile and spatial-filtering functions***

The synthetic temperature profile describing the combustion time-history of a premixed-flame was simulated as a variant of an exponential-growth process, and implemented with the logistic function,  $T(k)$ , progressed over discrete indices  $k$  according to:

$$T(k) = (T_{end} - T_{start}) \frac{1}{1 + e^{-(k - \Delta k)/b}} + T_{start}, k = \{1, 2, \dots, 100\} \quad \text{Eqn (1)}$$

with boundaries  $T_{end} = 2000$  K,  $T_{start} = 300$  K, inflexion point  $\Delta k = 50$  and rate-constant  $b = \{5, 10\}$ . The domain of the argument is arbitrary, however, with the range set to span  $\sim 2$  mm the choices of  $b$  representing the two flames with thicknesses  $\sim 360$   $\mu\text{m}$  and  $\sim 720$   $\mu\text{m}$ , respectively.

The spatial-filtering Gaussian functions simulating the imaging system blur were generated according to:

$$g(k) = C^{-1} e^{-\left(2\sqrt{\ln(2)}(k - \Delta k)/w\right)^2}, w = \{2, 5, 7.5\} \quad \text{Eqn (2)}$$

where  $C$  is the integral normalization constant, and the employed width ( $w$ ) representing the current filters with 40  $\mu\text{m}$ , 100  $\mu\text{m}$  and 150  $\mu\text{m}$  FWHM, respectively.

### ***CARS signal simulation and spectral fitting***

The temperature was evaluated by fitting the extracted spectra to a theoretical library of pre-calculated spectra for the prevailing conditions. The calculated CARS spectrum is recovered via the Fourier transform of the time-dependent CARS response ( $E_{CARS}$ ), which is the product of the impulsively excited  $\text{N}_2$  transients and the delayed ( $\tau$ ) probe-electric-field time-varying amplitude ( $E_{probe}$ ), according to;

$$E_{CARS}(t, \tau) = E_{probe}(t - \tau) \sum_{J=0}^{J_{max}} \Lambda_J e^{((i\Delta E_J - \Gamma_J)t/\hbar)} \quad \text{Eqn (3)}$$

where  $\Delta E_J$  denote the  $N_2$  transition energy,  $\Gamma_J$  the reciprocal dephasing time, and  $\Lambda_J$  the oscillation amplitude of the  $J$ -specific S ( $\Delta v=0, \Delta J=2$ ) transition involved. The specific contributions from major perturbing species-colliders on the total dephasing time were included in the calculation and weighted according to chemical equilibrium calculations of the specific flame-conditions involved. The oscillation amplitude depends on the isotropic- and/or anisotropic polarizability tensor invariant, and the normalized Boltzmann population difference factor. The CARS response is calculated here as an unmodulated signal, cancelling the probe-electric-field carrier-frequency, improving the speed of calculation. The probe-electric-field amplitude is approximated with a Gaussian shape (70 ps, FWHM), as verified through autocorrelation, measuring the CARS signal in a series of probe-delay-scans performed in a non-resonant gas of argon.
